# Supplementary material for: Effect of early tranexamic acid administration on mortality, hysterectomy, and other morbidities in women with post-partum haemorrhage (WOMAN): an international, randomised, double-blind, placebo-controlled trial
Source: PubMed Central journal article supplement — Lancet. 2017 May 27;389(10084):2105–16. doi: 10.1016/S0140-6736(17)30638-4 (PMC5446563; doi:10.1016/s0140-6736(17)30638-4), 2017-05-27
Supplement: mmc1.pdf [file mmc1.pdf]

# THE LANCET

## Supplementary appendix

This appendix formed part of the original submission and has been peer reviewed. We post it as supplied by the authors.

Supplement to: WOMAN Trial Collaborators. Effect of early tranexamic acid administration on mortality, hysterectomy, and other morbidities in women with post-partum haemorrhage (WOMAN): an international, randomised, double-blind, placebo-controlled trial. *Lancet* 2017; published online April 26. [http://dx.doi.org/10.1016/S0140-6736\(17\)30638-4](http://dx.doi.org/10.1016/S0140-6736(17)30638-4).

**Supplementary file 1a. Cause of death by hours from giving birth.**

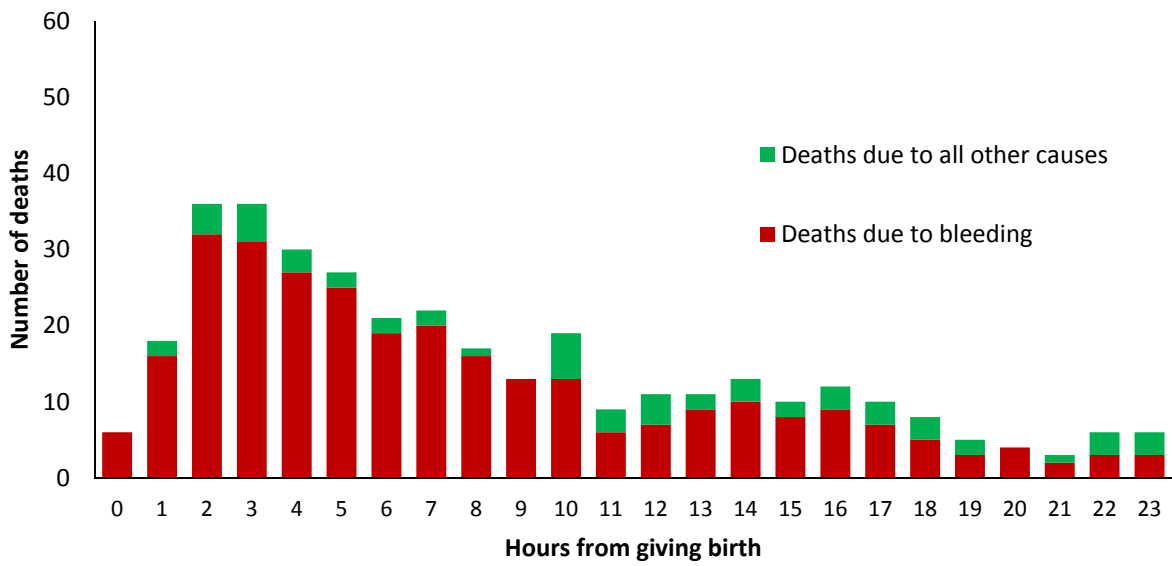

**Supplementary file 1b. Cause of hysterectomy by hours from giving birth.**

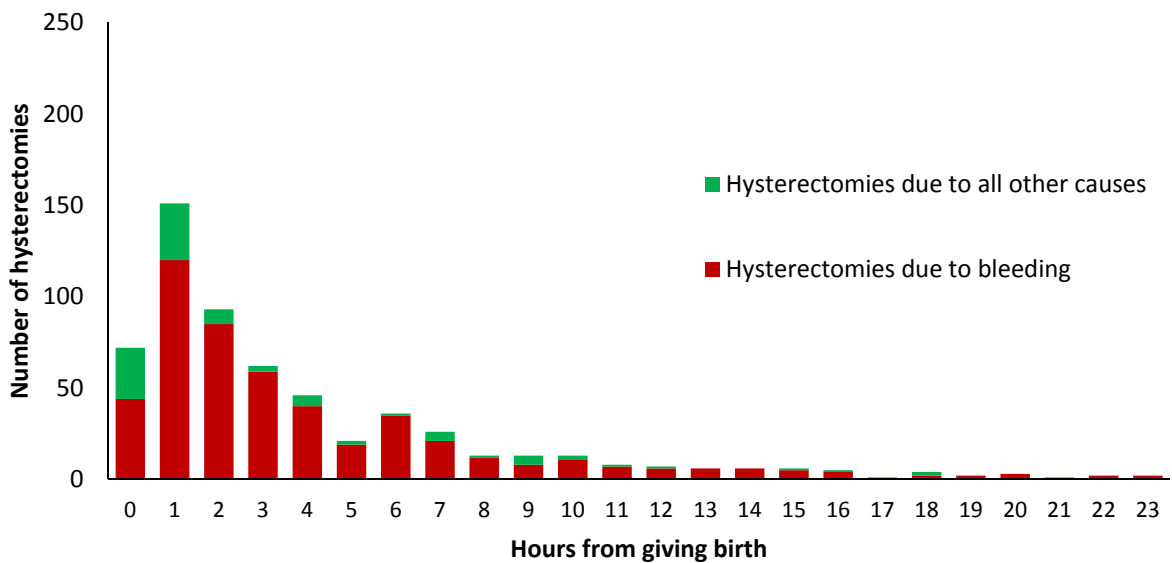

## Adverse Events

| Event                               | TXA | Placebo |
|-------------------------------------|-----|---------|
| Postpartum bleeding (secondary)     | 6   | 4       |
| Transfusion reaction                | 3   | 1       |
| Anaemia, postpartum                 | 2   | 2       |
| Retention urine                     | 2   | 1       |
| Urinary tract infection             | 2   | 2       |
| Wound infection                     | 2   | 1       |
| Abdominal pain                      | 1   | 0       |
| Allergic rash                       | 1   | 0       |
| Calf pain                           | 1   | 0       |
| Endometritis postpartum             | 1   | 1       |
| Haematoma                           | 1   | 0       |
| Headache                            | 1   | 0       |
| Hypoglycaemic episode               | 1   | 0       |
| Incontinence of urine               | 1   | 0       |
| Pulmonary embolism                  | 1   | 1       |
| Thrombotic thrombocytopenic purpura | 1   | 0       |
| Vaginal infection                   | 1   | 0       |
| Vesicovaginal fistula               | 1   | 0       |
| Vomiting                            | 1   | 0       |
| Allergic reaction                   | 0   | 1       |
| Anxiety                             | 0   | 1       |
| Cardiac arrest                      | 0   | 1       |
| Disruption of caesarean wound       | 0   | 1       |
| Dysfunctional uterine bleeding      | 0   | 1       |
| Eclampsia                           | 0   | 1       |
| Haematuria                          | 0   | 1       |
| Jaundice                            | 0   | 1       |
| Malaria                             | 0   | 1       |
| Papilloedema                        | 0   | 1       |
| Perineal infection                  | 0   | 1       |
| Retained products of conception     | 0   | 1       |
| Swelling                            | 0   | 1       |
| Urticarial rash                     | 0   | 1       |
